# Supplementary material
Source: PubMed Central journal article supplement (PMC8058275)
Supplement: NIHMS1673873-supplement-Supplemental_Material.pdf [file NIHMS1673873-supplement-Supplemental_Material.pdf]

## SUPPLEMENTAL MATERIAL

**Supplemental Methods.** Society of Thoracic Surgeons (STS) Adult Cardiac Surgery Database (ACSD)

variable definitions for TAVR-explant indications.

STS ACSD Versions 2.81 (effective 7/1/2014–6/30/2017) and 2.9 (effective 7/1/2017–6/30/2020)

Parent variable #3310 Valve Prosthesis Explant (ValExp) = “yes”

Variable #3325 Valve Explant Etiology (ValExpEt):

- 1=Endocarditis
- 2=Failed repair
- 3=Hemolysis
- 4=Incompetence
- 5=Pannus
- 6=Para-valvular leak
- 7=Prosthetic deterioration
- 8=Sizing/positioning issue
- 9=Stenosis
- 10=Thrombosis
- 11=Other
- 12=Unknown

STS ACSD Version 2.73 (effective 7/1/2011–6/30/2014)

Parent variable #1216 Previous Valve (PrValve) = “yes”

Variable #1340 Indication for Reoperation (IndReop):

- 1=Structural Prosthetic Valve Deterioration defined as wear, fracture, poppet escape, calcification, leaflet tear, stent creep
- 2=Non-structural prosthetic valve dysfunction defined as entrapment by pannus, paravalvular leak, obstruction, or inappropriate sizing
  - Variable #1350 Non-Structural Valve Dysfunction subcategories
  - 1=Paravalvular Leak
  - 2=Hemolysis
  - 3=Entrapment by pannus, tissue, or suture
  - 4=Sizing or positioning issue
  - 5=Other
- 3=Prosthetic valve endocarditis defined as infection, active or treated
- 4=Valve Thrombosis
- 5=Failed Repair
- 6=Repeat valve procedure on a different valve
- 7=Other

**Supplemental Figure I.** Number of transcatheter aortic valve replacement (TAVR) procedures per year (total, n=9,756) captured in the Michigan Transcatheter Valve Therapy (TVT) Registry.

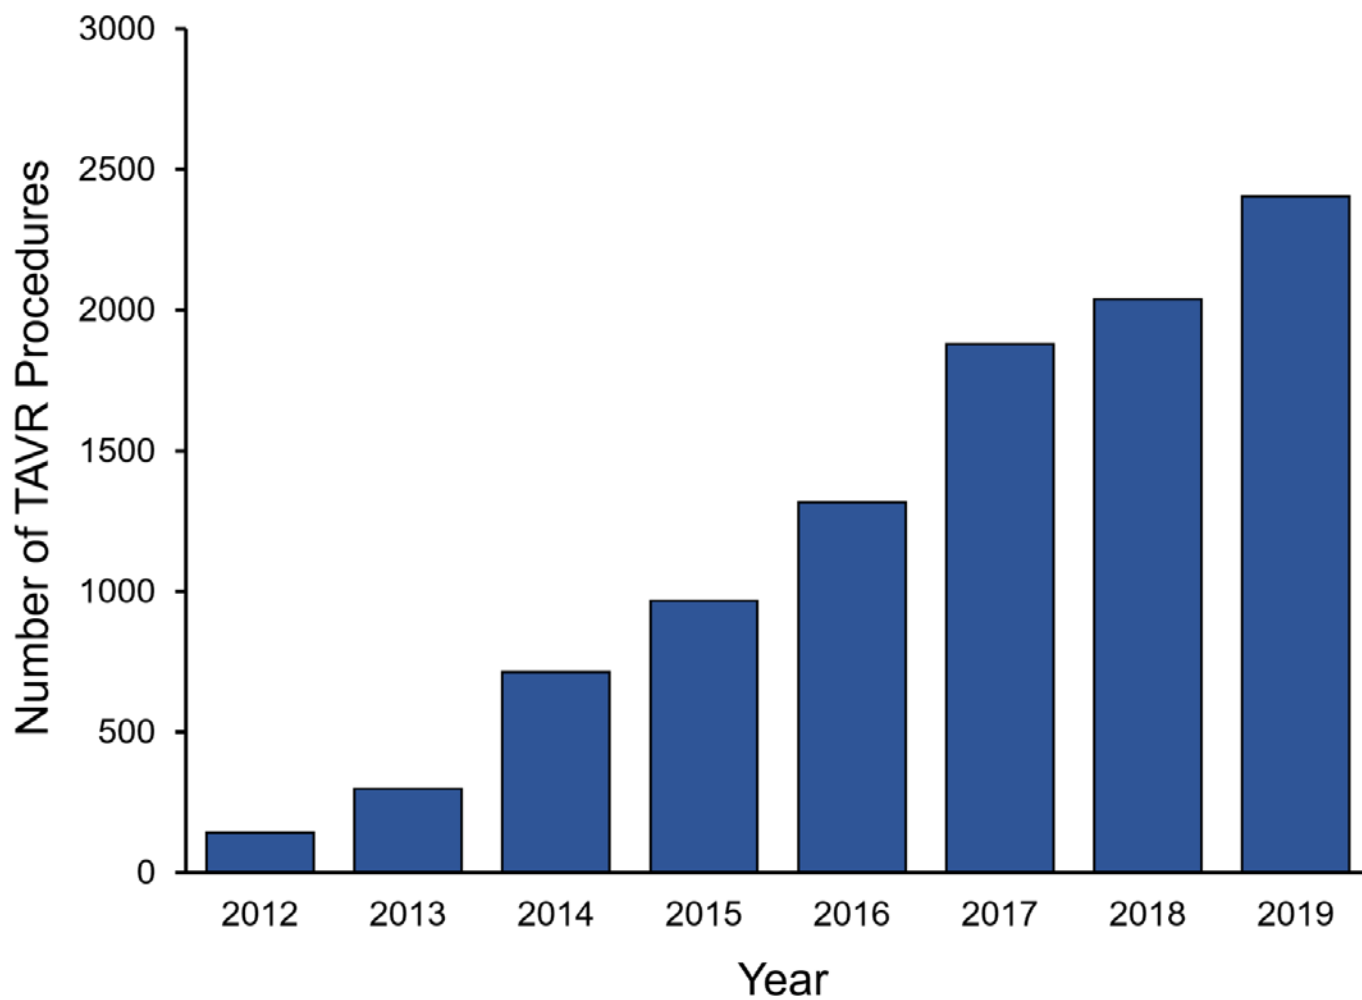

**Supplemental Figure II.** Indications for TAVR-explant by explanted valve type: A) self-expanding (n=29) and B) balloon-expandable (n=12). Explanted device type was known for 41/46 (89%) patients. Some patients had more than one indication for TAVR-explant.

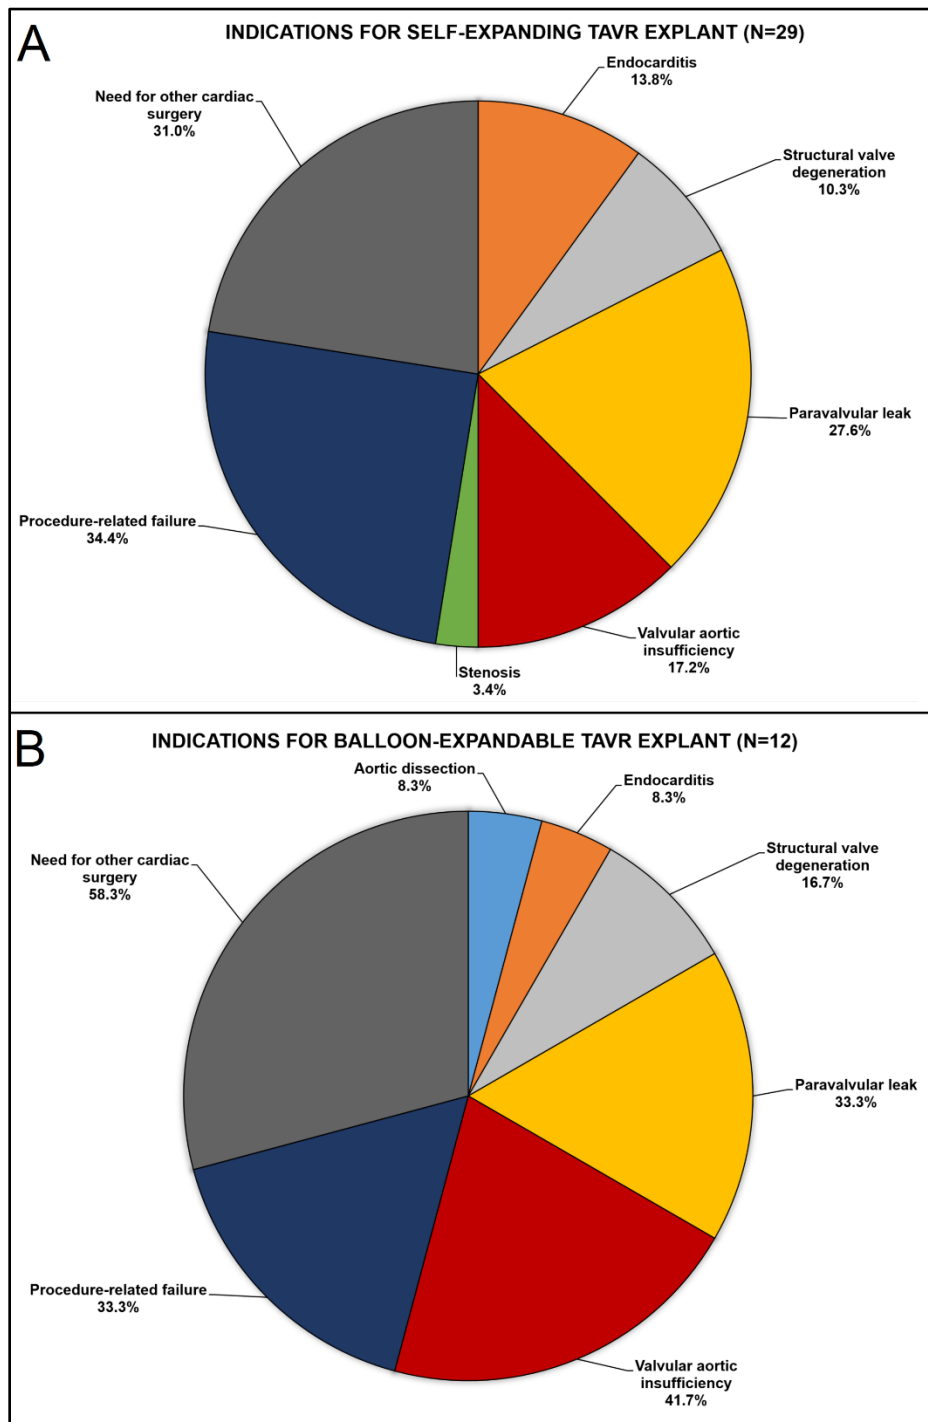

**Supplemental Figure III.** Indications for TAVR-explant by valve age: A) early TAVR-explant (<1 year, n=28) and B) late explant (>1 year, n=16). Explanted device age was known for 44/46 (96%) patients. Some patients had more than one indication for TAVR-explant. All 11 patients who underwent TAVR-explant as an emergent/urgent conversion to surgery on the same day as index TAVR had a “problem with sizing or position” indication for TAVR-explant.

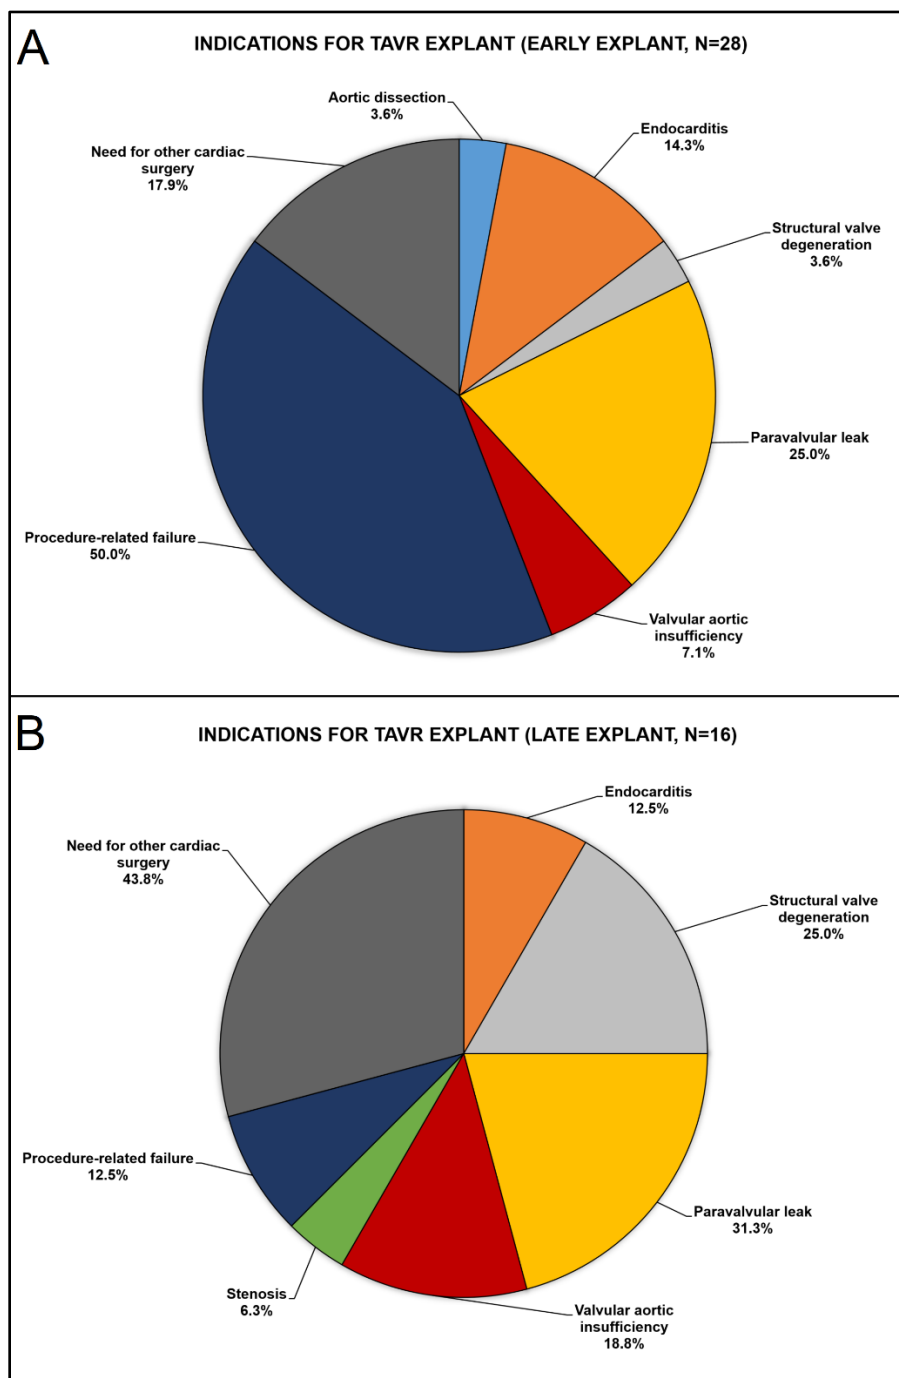

**Supplemental Figure IV.** Cumulative survival after surgical explantation of transcatheter aortic valve replacement (TAVR) valve.

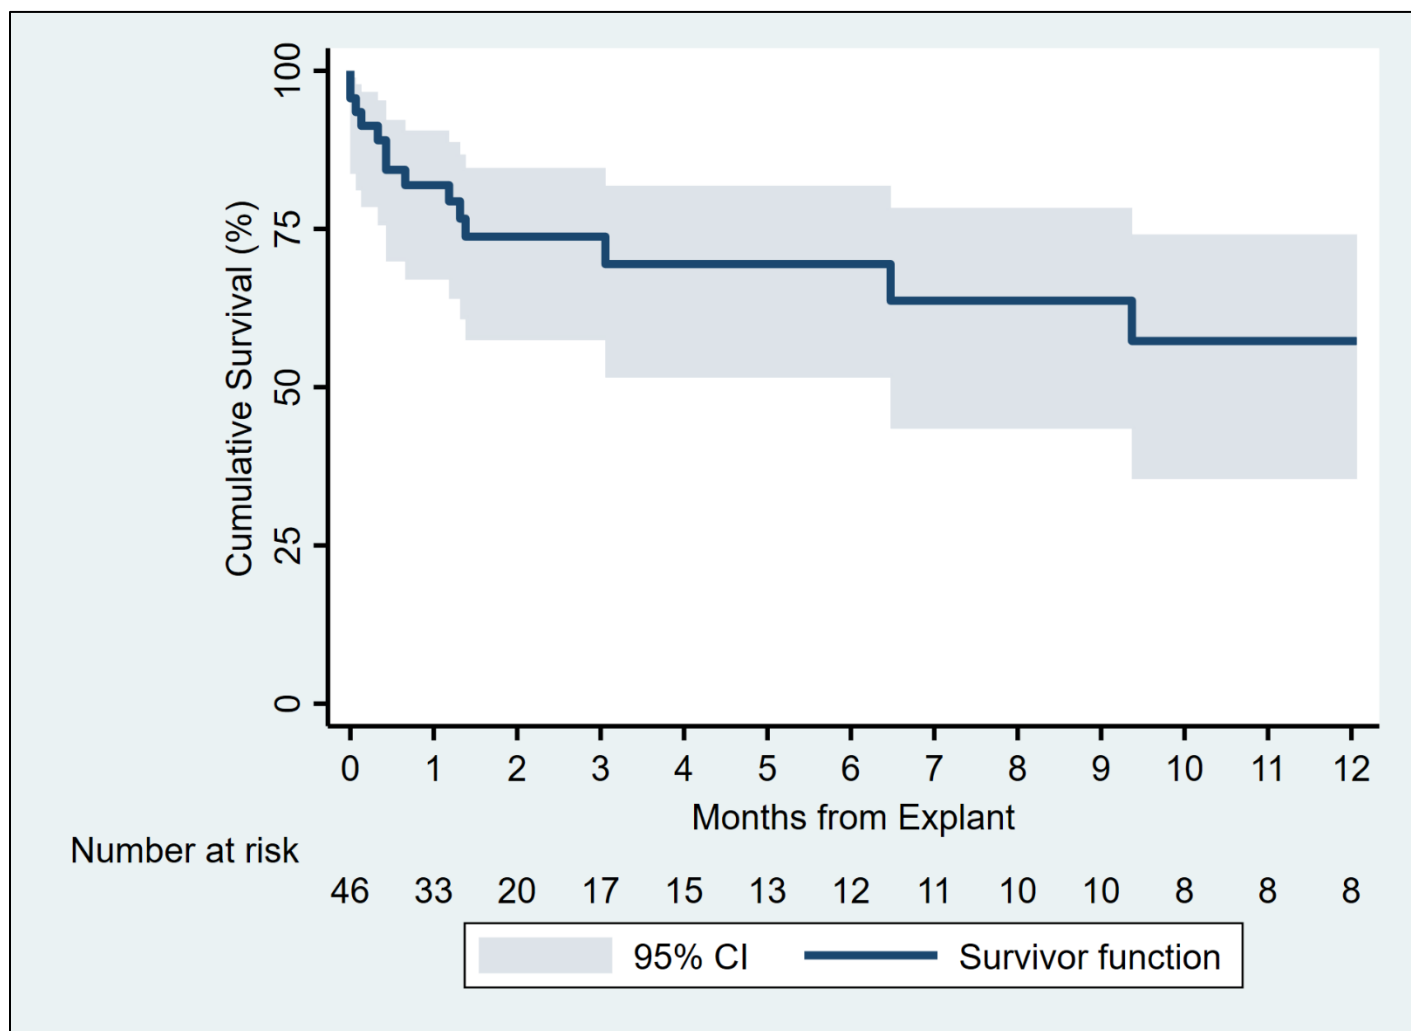

**Supplemental Table I.** Patient characteristics and echocardiography data at time of primary transcatheter aortic valve replacement (TAVR) procedure. Data from the primary TAVR procedure were available for 42/46 (91%) of patients. Data available in less than 42 patients is noted next to the characteristic name.

Values are expressed as number (%) or median (interquartile range).

| Characteristic                                                                          | Overall (n=42) | Early Explant (<1 year, n=26) | Late Explant (>1 year, n=16) | P value      |
|-----------------------------------------------------------------------------------------|----------------|-------------------------------|------------------------------|--------------|
| Infective endocarditis                                                                  | 2 (5)          | 1 (4)                         | 1 (6)                        | 1.00         |
| Permanent pacemaker (n=41)                                                              | 8 (20)         | 5 (19)                        | 3 (20)                       | 1.00         |
| Prior CABG (n=41)                                                                       | 5 (12)         | 2 (8)                         | 3 (20)                       | 0.34         |
| Prior other cardiac surgery (n=41)                                                      | 3 (7)          | 2 (8)                         | 1 (7)                        | 1.00         |
| Prior stroke (n=41)                                                                     | 6 (15)         | 4 (15)                        | 2 (13)                       | 1.00         |
| Hostile chest (n=41)                                                                    | 5 (12)         | 2 (8)                         | 3 (20)                       | 0.34         |
| Porcelain aorta                                                                         | 3 (7)          | 1 (4)                         | 2 (13)                       | 0.55         |
| NYHA class within 2 weeks                                                               |                |                               |                              |              |
| I                                                                                       | 1 (2)          | 0                             | 1 (6)                        | 0.08         |
| II                                                                                      | 8 (19)         | 7 (27)                        | 1 (6)                        |              |
| III                                                                                     | 20 (48)        | 11 (42)                       | 9 (56)                       |              |
| IV                                                                                      | 11 (26)        | 8 (31)                        | 3 (19)                       |              |
| Unknown                                                                                 | 2 (5)          | 0                             | 2 (13)                       |              |
| Median (interquartile range) STS risk of mortality at index TAVR (without incrementals) | 4.2% (2.7–9.2) | 3.5% (2.7–7.6)                | 5.1% (2.6–11.7)              | 0.28         |
| Low (<4%)                                                                               | 19 (45)        | 14 (54)                       | 5 (31)                       | 0.36         |
| Intermediate (4-8%)                                                                     | 11 (26)        | 6 (23)                        | 5 (31)                       |              |
| High (>8%)                                                                              | 12 (29)        | 6 (23)                        | 6 (38)                       |              |
| <b>Operator risk classification at initial TAVR</b>                                     |                |                               |                              |              |
| <b>Low risk</b>                                                                         | <b>0</b>       | <b>0</b>                      | <b>0</b>                     | <b>0.045</b> |
| <b>Intermediate risk</b>                                                                | <b>14 (33)</b> | <b>11 (42)</b>                | <b>3 (19)</b>                |              |
| <b>High risk</b>                                                                        | <b>20 (48)</b> | <b>13 (50)</b>                | <b>7 (44)</b>                |              |
| <b>Prohibitive/extreme risk</b>                                                         | <b>8 (19)</b>  | <b>2 (8)</b>                  | <b>6 (38)</b>                |              |
| <b>Aortic valve annular calcification (n=40)</b>                                        | <b>25 (63)</b> | <b>19 (76)</b>                | <b>6 (40)</b>                | <b>0.042</b> |
| Primary TAVR indication (n=41)                                                          |                |                               |                              |              |
| Primary aortic stenosis                                                                 | 26 (63)        | 17 (68)                       | 9 (56)                       | 0.70         |
| Primary aortic insufficiency                                                            | 1 (2)          | 1 (4)                         | 0                            |              |

|                                                                  |         |         |         |      |
|------------------------------------------------------------------|---------|---------|---------|------|
| Mixed stenosis/insufficiency                                     | 0       | 0       | 0       |      |
| Failed bioprosthetic valve                                       | 14 (34) | 7 (28)  | 7 (44)  |      |
| Mitral valve disease                                             |         |         |         |      |
| Mitral stenosis (n=37)                                           | 2 (5)   | 1 (4)   | 1 (8)   | 1.00 |
| Mitral regurgitation (n=41)                                      |         |         |         |      |
| None                                                             | 4 (10)  | 1 (4)   | 3 (19)  | 0.52 |
| Trace/trivial                                                    | 5 (12)  | 4 (16)  | 1 (6)   |      |
| Mild                                                             | 19 (46) | 12 (48) | 7 (44)  |      |
| Moderate                                                         | 8 (20)  | 5 (20)  | 3 (19)  |      |
| Moderate-to-Severe                                               | 4 (10)  | 3 (12)  | 1 (6)   |      |
| Severe                                                           | 1 (2)   | 0       | 1 (6)   |      |
| Tricuspid regurgitation (n=40)                                   |         |         |         |      |
| None                                                             | 0       | 0       | 0       | 0.62 |
| Trace/trivial                                                    | 11 (28) | 8 (33)  | 3 (19)  |      |
| Mild                                                             | 20 (50) | 10 (42) | 10 (63) |      |
| Moderate                                                         | 7 (18)  | 5 (21)  | 2 (13)  |      |
| Severe                                                           | 2 (5)   | 1 (4)   | 1 (6)   |      |
| Valve-in-valve procedures (TAVR in bioprosthetic surgical valve) | 14 (33) | 7 (27)  | 7 (44)  | 0.32 |
| Device implant type (n=41)                                       |         |         |         |      |
| Balloon-expandable                                               | 12 (29) | 9 (36)  | 3 (19)  | 0.31 |
| Self-expanding                                                   | 29 (71) | 16 (64) | 13 (81) |      |
| Post-procedure paravalvular insufficiency (n=34)                 |         |         |         |      |
| None                                                             | 21 (62) | 11 (55) | 10 (71) | 0.62 |
| Trace/trivial                                                    | 0       | 0       | 0       |      |
| Mild                                                             | 8 (24)  | 6 (30)  | 2 (14)  |      |
| Moderate                                                         | 5 (15)  | 3 (15)  | 2 (14)  |      |
